# Supplementary material for: Systems pharmacology exploration of botanic drug pairs reveals the mechanism for treating different diseases
Source: PubMed Central journal article supplement (PMC5107896; doi:10.1038/srep36985), 2016-11-14
Supplement: srep36985-s1.pdf [file srep36985-s1.pdf]

# **Systems pharmacology exploration of botanic drug pairs reveals the mechanism for treating different diseases**

Wei Zhou<sup>a,b,c,d</sup>, Jinan Wang<sup>a</sup>, ZiyinWu<sup>a</sup>, Chao Huang<sup>a</sup>, Aiping Lu<sup>c,d</sup>, YonghuaWang<sup>a,b,\*</sup>

<sup>a</sup> Key Laboratory of Xinjiang Endemic Phytomedicine Resources, Ministry of Education; Pharmacology Department, School of Pharmacy, Shihezi University, Shihezi, Xinjiang, China.

<sup>b</sup> Center of Bioinformatics, Northwest A & F University, Yangling 712100, Shaanxi, China.

<sup>c</sup> Institute of Arthritis Research, Shanghai Academy of Chinese Medical Sciences, Guanghua Integrative Medicine Hospital / Shanghai University of T.C.M, Shanghai 200052, China.

<sup>d</sup> Institute of Basic Research in Clinical Medicine, China Academy of Chinese Medical Sciences, Beijing 100700, China.

\*Corresponding author: YH Wang: dcpwyh@163.com. Tel. & Fax: +86-029-87092262.

## Supplementary table legends

**Table S1** The computational efficiency of algorithms used in our strategy.

**Table S2** 92 active compounds from three Danshen herb pairs and corresponding predicted OB, DL and DHL.

**Table S3** All compounds, targets and related diseases information of three Danshen herb pairs.

**Table S4** 70 active compounds in four herbs and the corresponding calculated OB, DL and HL.

**Table S5** Enriched PCA-related molecular properties terms of three Danshen herb pairs.

**Table S6** The information of compound-target-disease network in three Danshen herb pairs.

Table S1 The computational efficiency of algorithms used in our strategy.

| Algorithm | Software/Language | CPU Type        | CPU Time     | Memory       |
|-----------|-------------------|-----------------|--------------|--------------|
| OB        | Matlab            | 16 core 3.2G Hz | < 30 minutes | 8G           |
| DL        | Matlab            | 16 core 3.2G Hz | < 5 minutes  | 8G           |
| HL        | Matlab            | 16 core 3.2G Hz | < 5 minutes  | 8G           |
| SVM/RF    | Matlab            | 16 core 3.2G Hz | < 4 hour     | 8G           |
| Docking   | Autodock          | 16 core 3.2G Hz | < 50 hour    | 8G           |
| MD        | Amber 10          | 16 core 3.2G Hz | ~1 month     | 32 * 16 node |

Table S4 70 active compounds in four herbs and the corresponding calculated OB, DL and HL.

| NO.  | Compound                                                                               | Structure                                                                           | OB    | DL   | HL    | Herbs                  |
|------|----------------------------------------------------------------------------------------|-------------------------------------------------------------------------------------|-------|------|-------|------------------------|
| DS1  | oleanolic acid                                                                         | 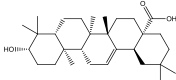   | 29.02 | 0.76 | 4.56  | <i>S.miltiorrhizae</i> |
| DS2  | ursolic acid                                                                           |    | 16.77 | 0.75 | 4.73  | <i>S.miltiorrhizae</i> |
| DS3  | digallic acid                                                                          |    | 61.85 | 0.26 | 5.29  | <i>S.miltiorrhizae</i> |
| DS4  | stigmasterol                                                                           |    | 43.83 | 0.76 | 5.34  | <i>S.miltiorrhizae</i> |
| DS5  | gamma-sitosterol                                                                       |    | 36.91 | 0.75 | 5.07  | <i>S.miltiorrhizae</i> |
| DS11 | 1-(3,4-dihydroxyphenyl)-2-hydroxyethanone                                              |    | 56.79 | 0.04 | 17.93 | <i>S.miltiorrhizae</i> |
| DS12 | 3,7-dimethylocta-2,6-dien-1-yl formate                                                 |    | 50.95 | 0.03 | 7.13  | <i>S.miltiorrhizae</i> |
| DS14 | 2-(4-hydroxy-3-methoxyphenyl)-5-(3-hydroxypropyl)-7-methoxy-3-benzofurancarboxaldehyde |  | 62.78 | 0.40 | 7.89  | <i>S.miltiorrhizae</i> |
| DS15 | 6-o-syringyl-8-o-acetylshanzhiside methyl ester                                        |  | 46.69 | 0.71 | 9.94  | <i>S.miltiorrhizae</i> |
| DS16 | formyltanshinone                                                                       |  | 73.44 | 0.42 | 24.12 | <i>S.miltiorrhizae</i> |
| DS17 | przewaquinone B                                                                        |  | 62.24 | 0.41 | 24.94 | <i>S.miltiorrhizae</i> |
| DS19 | tanshinaldehyde                                                                        |  | 52.47 | 0.45 | 23.49 | <i>S.miltiorrhizae</i> |
| DS20 | tanshinol II                                                                           |  | 57.95 | 0.56 | 4.28  | <i>S.miltiorrhizae</i> |
| DS21 | tanshinol I                                                                            |  | 56.97 | 0.52 | 5.15  | <i>S.miltiorrhizae</i> |
| DS22 | baicalin                                                                               |  | 10.21 | 0.75 | 15.46 | <i>S.miltiorrhizae</i> |
| DS23 | cryptotanshinone                                                                       |  | 52.34 | 0.40 | 17.30 | <i>S.miltiorrhizae</i> |
| DS24 | dan-shexinkum d                                                                        |  | 38.88 | 0.55 | 30.00 | <i>S.miltiorrhizae</i> |

|      |                                                                              |                                                                                     |       |      |       |                        |
|------|------------------------------------------------------------------------------|-------------------------------------------------------------------------------------|-------|------|-------|------------------------|
| DS25 | danshen spiroketal lactone                                                   | 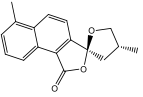   | 50.43 | 0.31 | 15.19 | <i>S.miltiorrhizae</i> |
| DS26 | daucosterol                                                                  |    | 36.91 | 0.63 | 9.46  | <i>S.miltiorrhizae</i> |
| DS28 | ethyl lithospermate                                                          |    | 26.37 | 0.82 | 15.32 | <i>S.miltiorrhizae</i> |
| DS29 | isocryptotanshinone                                                          |    | 54.98 | 0.39 | 31.92 | <i>S.miltiorrhizae</i> |
| DS30 | isosalvianolic acid c                                                        |    | 2.48  | 0.83 | 5.91  | <i>S.miltiorrhizae</i> |
| DS31 | lithospermic acid                                                            |    | 2.67  | 0.76 | 15.68 | <i>S.miltiorrhizae</i> |
| DS32 | methyltanshinonate                                                           |    | 19.19 | 0.55 | 24.11 | <i>S.miltiorrhizae</i> |
| DS33 | neocryptotanshinone                                                          |    | 52.49 | 0.32 | 14.46 | <i>S.miltiorrhizae</i> |
| DS34 | prolithospermic acid                                                         |   | 64.37 | 0.31 | 8.82  | <i>S.miltiorrhizae</i> |
| DS35 | salvianolic acid A                                                           |  | 2.96  | 0.70 | 5.21  | <i>S.miltiorrhizae</i> |
| DS36 | salvianolic acid C                                                           |  | 2.50  | 0.81 | 13.62 | <i>S.miltiorrhizae</i> |
| DS37 | (Z)-3-[2-[(E)-2-(3,4-dihydroxyphenyl)vinyl]-3,4-dihydroxyphenyl]acrylic acid |  | 88.54 | 0.26 | 4.31  | <i>S.miltiorrhizae</i> |
| DS38 | salvianolic acid j                                                           |  | 43.38 | 0.72 | 5.77  | <i>S.miltiorrhizae</i> |
| DS39 | tanshindiol a                                                                |  | 75.39 | 0.46 | 23.45 | <i>S.miltiorrhizae</i> |
| DS40 | tanshinone IIb                                                               |  | 65.26 | 0.45 | 23.48 | <i>S.miltiorrhizae</i> |
| DS41 | salvianolic acid B                                                           |  | 3.01  | 0.41 | 18.53 | <i>S.miltiorrhizae</i> |
| YMC1 | beta-sitosterone                                                             |  | 38.00 | 0.76 | 5.45  | <i>H. leonuri</i>      |

|       |                                    |                                                                                     |        |      |       |                    |
|-------|------------------------------------|-------------------------------------------------------------------------------------|--------|------|-------|--------------------|
| YMC2  | (-)-alloaromadendrene              |    | 54.04  | 0.10 | 12.06 | <i>H. leonuri</i>  |
| YMC3  | quercetin-3-o-galactopyranoside    |    | 56.53  | 0.77 | 17.47 | <i>H. leonuri</i>  |
| YMC4  | quercetin                          |    | 46.43  | 0.77 | 14.40 | <i>H. leonuri</i>  |
| YMC5  | rutin                              |    | 46.43  | 0.68 | 16.13 | <i>H. leonuri</i>  |
| YMC6  | tiliroside                         |    | 1.94   | 0.66 | 16.51 | <i>H. leonuri</i>  |
| YMC7  | Isorhamnetin-3-o-beta-d-rutinoside |    | 62.00  | 0.65 | 13.95 | <i>H. leonuri</i>  |
| YMC8  | leonuridine                        |   | 106.15 | 0.33 | 6.42  | <i>H. leonuri</i>  |
| YMC9  | leonurine                          |  | 19.12  | 0.20 | 4.71  | <i>H. leonuri</i>  |
| YMC10 | apigenin                           |  | 69.81  | 0.21 | 16.62 | <i>H. leonuri</i>  |
| YMC11 | kaempferol                         |  | 69.31  | 0.24 | 12.68 | <i>H. leonuri</i>  |
| XF1   | luteolin                           |  | 36.16  | 0.78 | 15.94 | <i>C. rotundus</i> |
| XF4   | oleanolic acid                     |  | 29.02  | 0.76 | 4.56  | <i>C. rotundus</i> |
| XF5   | daucosterol                        |  | 36.91  | 0.62 | 10.12 | <i>C. rotundus</i> |
| XF6   | $\beta$ -sitosterol                |  | 36.91  | 0.75 | 5.37  | <i>C. rotundus</i> |
| XF7   | stigmasterol                       |  | 43.83  | 0.76 | 5.57  | <i>C. rotundus</i> |
| XF9   | isocurcumenol                      |  | 97.67  | 0.13 | 9.52  | <i>C. rotundus</i> |

|      |                                                                                                                                   |                                                                                     |       |      |       |                    |
|------|-----------------------------------------------------------------------------------------------------------------------------------|-------------------------------------------------------------------------------------|-------|------|-------|--------------------|
| XF11 | (4a <i>S</i> ,6 <i>R</i> ,8 <i>aS</i> )-4a-hydroxy-4,8a-dimethyl-6-prop-1-en-2-yl-5,6,7,8-tetrahydro-1 <i>H</i> -naphthalen-2-one | 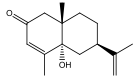   | 53.42 | 0.12 | 6.42  | <i>C.rotundus</i>  |
| XF12 | beta-Rotunol                                                                                                                      |    | 59.69 | 0.12 | 6.63  | <i>C.rotundus</i>  |
| XF14 | (-)-dehydroaromadendrene                                                                                                          |    | 53.59 | 0.10 | 11.69 | <i>C.rotundus</i>  |
| XF15 | 5beta-Cyprinol                                                                                                                    |    | 12.57 | 0.83 | 6.20  | <i>C.rotundus</i>  |
| XF16 | guaidiol                                                                                                                          |    | 72.00 | 0.11 | 8.86  | <i>C.rotundus</i>  |
| XF18 | khelloside                                                                                                                        |    | 74.96 | 0.72 | 14.34 | <i>C.rotundus</i>  |
| XF19 | ledane                                                                                                                            |    | 52.82 | 0.10 | 11.80 | <i>C.rotundus</i>  |
| XF20 | nootkatene                                                                                                                        |    | 33.13 | 0.71 | 7.07  | <i>C.rotundus</i>  |
| XF21 | nootkatone                                                                                                                        |   | 33.04 | 0.75 | 4.39  | <i>C.rotundus</i>  |
| XF23 | rotundenol                                                                                                                        |  | 74.95 | 0.84 | 7.51  | <i>C.rotundus</i>  |
| XF24 | stigmasterol glucoside                                                                                                            |  | 43.83 | 0.63 | 7.69  | <i>C.rotundus</i>  |
| XF25 | sugetriol                                                                                                                         |  | 68.87 | 0.16 | 8.51  | <i>C.rotundus</i>  |
| XF26 | alpha-cyperone                                                                                                                    |  | 35.37 | 0.10 | 5.49  | <i>C.rotundus</i>  |
| ZL1  | epibetulinic acid                                                                                                                 |  | 15.66 | 0.78 | 8.62  | <i>E.japonicum</i> |
| ZL2  | oleanolic acid                                                                                                                    |  | 17.74 | 0.76 | 4.83  | <i>E.japonicum</i> |
| ZL3  | ursolic acid                                                                                                                      |  | 17.70 | 0.76 | 4.86  | <i>E.japonicum</i> |
| ZL4  | $\beta$ -sitosterol                                                                                                               |  | 36.91 | 0.75 | 5.36  | <i>E.japonicum</i> |
| ZL5  | daucosterol                                                                                                                       |  | 36.91 | 0.63 | 6.88  | <i>E.japonicum</i> |
| ZL6  | cholanic acid                                                                                                                     |  | 18.95 | 0.59 | 5.27  | <i>E.japonicum</i> |
| ZL7  | dibutyl phthalate                                                                                                                 |  | 64.54 | 0.13 | 5.41  | <i>E.japonicum</i> |
